# Supplementary material for: Perceptions about screening for prostate cancer using genetic lifetime risk assessment: a qualitative study
Source: Springer Nature journal article supplement (doi:10.1186/s12875-018-0717-6), 2018-02-17
Supplement: MOESM2 [file 15472702]

**Table S1.** Participant characteristics including age, marital status, education, and number of relatives with PCa

| Participant | Age | Marital status | Educational level           | Relatives with PCa |
|-------------|-----|----------------|-----------------------------|--------------------|
| Jørgen      | 59  | Married        | Post-secondary non-tertiary | 1                  |
| Jens        | 55  | Married        | Short-cycle tertiary        | 1                  |
| John        | 61  | Single         | Master or equivalent        | 1                  |
| Peter       | 34  | Single         | Post-secondary non-tertiary | 1                  |
| Harald      | 55  | Married        | Master or equivalent        | 0                  |
| Bent        | 51  | Co-habiting    | Master or equivalent        | 0                  |
| Johan       | 61  | Single         | Short-cycle tertiary        | 1                  |
| Hans        | 58  | Married        | Post-secondary non-tertiary | 0                  |
| Regnar      | 58  | Married        | Upper secondary             | 0                  |
| Gunnar      | 67  | Married        | Post-secondary non-tertiary | 1                  |
| Frede       | 60  | Single         | Post-secondary non-tertiary | 1                  |
| Johannes    | 62  | Married        | Post-secondary non-tertiary | 0                  |
